# Supplementary material for: Exercise Enhances Branched-Chain Amino Acid Catabolism and Decreases Cardiac Vulnerability to Myocardial Ischemic Injury
Source: MDPI journal article supplement (doi:10.3390/cells11101706), 2022-05-20
Supplement: s1 [file s1]

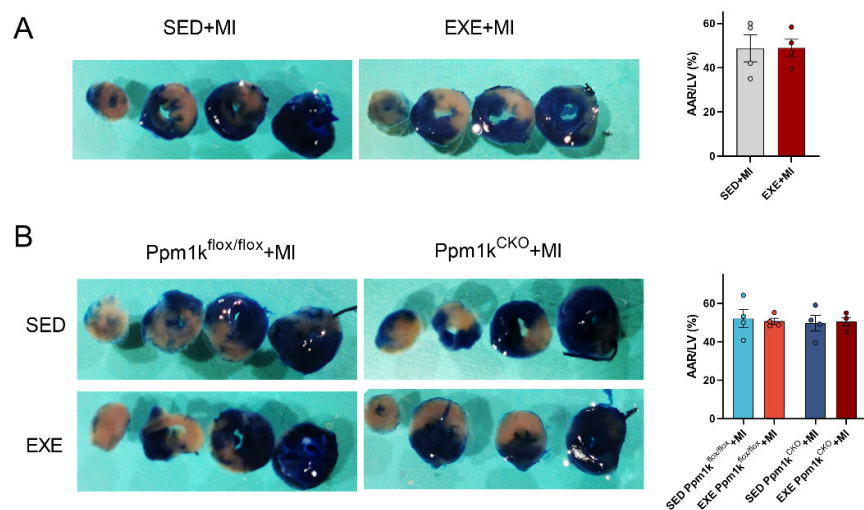

**Figure S1. Myocardial area at risk after MI.** A. Representative photographs of LV sections and myocardial area at risk as a percentage of LV in sedentary and exercise group after MI. B. Representative photographs of LV sections and myocardial area at risk as a percentage of LV in sedentary Ppm1k<sup>flox/flox</sup> and Ppm1k<sup>CKO</sup> and exercise Ppm1k<sup>flox/flox</sup> and Ppm1k<sup>CKO</sup> group. Blue portion, non-ischemic normal region; red portion, myocardial area at risk.

**Table S1. Differentially concentrated metabolites.**

| Name                                                                                                                                              | log2_FC(case<br>mean/control mean) | P value  | VIP      |
|---------------------------------------------------------------------------------------------------------------------------------------------------|------------------------------------|----------|----------|
| dUMP                                                                                                                                              | 4.278826                           | 0.016664 | 1.143099 |
| DODEC-2-ENE-8,10-DIYNOIC ACID                                                                                                                     | 4.152134                           | 0.041907 | 6.651161 |
| ISOBUTYLAMIDE                                                                                                                                     |                                    |          |          |
| Monobromobisphenol A                                                                                                                              | 4.101963                           | 0.016384 | 2.741813 |
| Fawcettimine                                                                                                                                      | 4.063611                           | 0.042633 | 8.461916 |
| Tulobuterol hydrochloride                                                                                                                         | 3.435245                           | 0.038239 | 3.515647 |
| L-Histidine                                                                                                                                       | 2.501883                           | 6.27E-05 | 9.16746  |
| Propane-1,2-diol 1-phosphate                                                                                                                      | 2.172405                           | 0.000311 | 2.093217 |
| Tramadol N-Oxide                                                                                                                                  | 1.747885                           | 0.049128 | 1.472309 |
| Se-Methyl-L-selenocysteine                                                                                                                        | 1.469562                           | 0.001786 | 2.639209 |
| DL-p-Hydroxyphenyllactic acid                                                                                                                     | 1.015997                           | 5.41E-07 | 2.480248 |
| Gentisinic acid                                                                                                                                   | 0.842578                           | 0.038154 | 1.348337 |
| 15-15-methyl PGF2 ethyl amide                                                                                                                     | 0.835755                           | 0.000168 | 1.282084 |
| Nitrogen mustard                                                                                                                                  | 0.803172                           | 7.78E-05 | 1.599091 |
| Metobromuron                                                                                                                                      | 0.736506                           | 0.009958 | 1.233196 |
| Indolelactic acid                                                                                                                                 | 0.720804                           | 3.54E-07 | 1.607432 |
| Indolelactic acid                                                                                                                                 | 0.711064                           | 1.93E-07 | 1.747982 |
| DL-3,4-Dihydroxymandelic acid                                                                                                                     | 0.684959                           | 0.027915 | 2.047504 |
| Nitrofurantoin                                                                                                                                    | 0.642433                           | 0.040237 | 1.008505 |
| N-oleoyl taurine                                                                                                                                  | 0.587157                           | 0.001671 | 1.05289  |
| Trans-2, 3, 4-Trimethoxycinnamate                                                                                                                 | 0.568577                           | 0.032154 | 1.722924 |
| Oxaziclomefone                                                                                                                                    | 0.559048                           | 0.002161 | 1.135124 |
| 3,5-Dinitroguaiacol                                                                                                                               | 0.554922                           | 9.19E-05 | 1.265006 |
| DL-2-Hydroxyvaleric acid                                                                                                                          | 0.554918                           | 0.000314 | 1.64695  |
| Chrysoeriol 7-[feruloyl(->2)-glucuronyl-<br>(1->2)-glucuronide]                                                                                   | 0.549963                           | 6.13E-05 | 1.542608 |
| Buprenorphine                                                                                                                                     | 0.544753                           | 0.007559 | 4.315259 |
| N-Arachidonoyl-L-Alanine                                                                                                                          | 0.541462                           | 0.001593 | 2.347112 |
| 2-Chloroethanol                                                                                                                                   | 0.535884                           | 0.008633 | 2.178579 |
| Isopentenyladenosine-5'-diphosphate                                                                                                               | 0.532122                           | 0.002739 | 1.07771  |
| Retinol                                                                                                                                           | 0.515577                           | 1.11E-05 | 2.017928 |
| [4-([5,7-dihydroxy-2-(3,4,5-trihydroxyphenyl)-<br>3,4-dihydro-2H-1-benzopyran-3-<br>yl]oxy)carbonyl)-2,6-<br>dihydroxyphenyl]oxidanesulfonic acid | 0.514158                           | 0.003108 | 1.030312 |
| dTDP-4-amino-4,6-dideoxy-D-glucose                                                                                                                | 0.496785                           | 0.000185 | 1.95969  |
| Epigallocatechin 3-O-cafeate                                                                                                                      | 0.496694                           | 1.82E-05 | 2.203969 |
| L-Cyclo                                                                                                                                           | 0.49155                            | 0.00954  | 6.870637 |
| PC(20:3(8Z,11Z,14Z)/0:0)                                                                                                                          | 0.441903                           | 0.000128 | 8.168778 |

|                                                                                                 |          |          |          |
|-------------------------------------------------------------------------------------------------|----------|----------|----------|
| 3,3',5,5'-Tetrahydroxy-6,7-methyleneoxy-4'-methoxyflavone 3-glucuronide                         | 0.434745 | 0.007685 | 1.694968 |
| 3-amino-octanoic acid                                                                           | 0.421982 | 0.024045 | 3.53711  |
| LysoPE(20:3(5Z,8Z,11Z)/0:0)                                                                     | 0.420853 | 0.00968  | 1.322986 |
| 2-Chloroethanol                                                                                 | 0.416959 | 0.04489  | 1.53908  |
| {4-[2,3-dioxo-3-(2,4,6-trihydroxy-3-methoxyphenyl)propyl]-2-methoxyphenyl} oxidanesulfonic acid | 0.416592 | 0.012978 | 1.470525 |
| dTDP-L-mycarose                                                                                 | 0.41644  | 0.000534 | 3.937428 |
| N-Nitrosomethylvinylamine                                                                       | 0.403398 | 0.024054 | 2.087289 |
| PC(7:0/O-8:0)                                                                                   | 0.395338 | 0.004307 | 2.965882 |
| 2-Hydroxycinnamic acid                                                                          | 0.385631 | 0.003115 | 7.574149 |
| PHENACYLAMINE                                                                                   | 0.373892 | 0.005423 | 7.588013 |
| gamma-Glutamylleucine                                                                           | 0.372912 | 0.036779 | 1.464854 |
| PC(20:3(8Z,11Z,14Z)/18:2(9Z,12Z))                                                               | 0.370141 | 0.038384 | 2.119952 |
| Phosphatidylethanolamine lyso 16:0                                                              | 0.363512 | 0.000184 | 1.772931 |
| LysoPC(22:4(7Z,10Z,13Z,16Z))                                                                    | 0.362115 | 0.010827 | 1.955925 |
| LysoPC(22:6(4Z,7Z,10Z,13Z,16Z,19Z))                                                             | 0.357272 | 0.002558 | 1.579047 |
| 5,6-Dihydro-5-fluorouracil                                                                      | 0.354809 | 0.026697 | 1.056667 |
| LysoPC(16:1(9Z))                                                                                | 0.350779 | 0.001615 | 5.468776 |
| 2-Chloroethanol                                                                                 | 0.343463 | 0.029213 | 1.718119 |
| 3-Hydroxybenzaldehyde                                                                           | 0.33373  | 0.009327 | 4.450684 |
| 16alpha-Bromo-17beta-estradiol                                                                  | 0.329507 | 0.011375 | 2.481616 |
| PC(18:4(9E,11E,13E,15E)/0:0)                                                                    | 0.321924 | 0.008139 | 1.013054 |
| 2-O-[2-O-(alpha-D-Mannopyranosyl)-alpha-D-glucopyranosyl]-3-phospho-D-glycerate                 | 0.321299 | 0.009267 | 2.063932 |
| (2-oxo-2,3-dihydro-1H-indol-3-yl)acetic acid                                                    | 0.314399 | 0.000339 | 1.557748 |
| Se-Methyl-L-selenocysteine                                                                      | 0.313306 | 0.018463 | 3.059098 |
| PC(17:1(10Z)/0:0)                                                                               | 0.312569 | 0.011605 | 1.301949 |
| NORLEUCINE                                                                                      | 0.312443 | 0.016664 | 9.91791  |
| PE(16:0/0:0)                                                                                    | 0.31099  | 0.002794 | 3.507526 |
| L-KYNURENINE                                                                                    | 0.301232 | 0.000311 | 2.248077 |
| 3-Buten-1-amine                                                                                 | 0.298976 | 0.006758 | 6.125716 |
| 1-(5'-Phosphoribosyl)-5-amino-4-(N-succinocarboxamide)-imidazole                                | 0.289417 | 0.002078 | 1.643057 |
| dTDP-3-methyl-4-oxo-2,6-dideoxy-L-allose                                                        | 0.283475 | 0.029578 | 5.516213 |
| 3,4-Dihydro-6-methoxy-2,2-dimethyl-2H-1-benzopyran-4-ol                                         | 0.283108 | 0.049796 | 1.253719 |
| (2R)-O-Phospho-3-sulfolactate                                                                   | 0.281074 | 0.046514 | 1.481207 |
| 2-Oxoglutaramate                                                                                | 0.278472 | 0.023604 | 3.729575 |
| Isoleucine                                                                                      | 0.275841 | 0.046503 | 11.0304  |
| LysoPC(22:5(4Z,7Z,10Z,13Z,16Z))                                                                 | 0.271323 | 0.029309 | 2.519319 |
| L-VALINE                                                                                        | 0.262689 | 0.028397 | 5.255685 |
| L-Valine                                                                                        | 0.246517 | 0.021444 | 8.937189 |

|                                     |          |          |          |
|-------------------------------------|----------|----------|----------|
| PC(0:0/20:4(5Z,8Z,11Z,14Z))         | 0.237519 | 0.045948 | 8.841944 |
| PE(18:0/0:0)                        | 0.20191  | 0.016566 | 2.239399 |
| Choline                             | 0.187367 | 0.008078 | 7.887709 |
| Tryptophan                          | 0.175467 | 0.039368 | 4.5526   |
| Idazoxan                            | 0.166204 | 0.047709 | 7.647384 |
| 3-Nitroacrylate                     | 0.153336 | 0.04227  | 1.337158 |
| 3-Nitroacrylate                     | 0.145922 | 0.024895 | 2.03583  |
| hydroxynefazodone                   | 0.125167 | 0.014474 | 1.10382  |
| Tambulin 3,5-diacetate              | 0.114064 | 0.000184 | 1.168525 |
| Leucomycin V                        | -0.05162 | 0.019806 | 1.392308 |
| L-GLUTAMINE                         | -0.09148 | 0.027943 | 3.552928 |
| Pyroglutamic acid                   | -0.09887 | 0.023416 | 4.081818 |
| GLYCERALDEHYDE                      | -0.13385 | 0.000693 | 3.966623 |
| L-Selenocysteine                    | -0.14811 | 0.006586 | 4.795814 |
| gamma-Glutamylglutamine             | -0.16212 | 0.033364 | 2.139814 |
| Imibencazole                        | -0.16873 | 0.010709 | 1.046652 |
| C16 Sphinganine                     | -0.18324 | 0.035733 | 7.686699 |
| Phloretin                           | -0.18532 | 0.033895 | 3.203772 |
| Arsonoacetate                       | -0.20235 | 0.042942 | 1.296191 |
| Novapikromycin                      | -0.21738 | 0.01522  | 1.198481 |
| Glu-Gln                             | -0.23661 | 0.011597 | 1.088874 |
| 5-AMINOPENTANOATE                   | -0.26891 | 0.003364 | 15.6871  |
| Janthitrem E                        | -0.27193 | 0.022584 | 1.196931 |
| O-Toluidine                         | -0.28031 | 0.048885 | 2.388327 |
| Melphalan                           | -0.37778 | 0.005282 | 1.255212 |
| Dihydroxyaluminium                  | -0.38438 | 0.015978 | 2.67492  |
| 17-Octadecynoic Acid                | -0.44498 | 0.024191 | 1.732163 |
| Methyl methylthio selenide          | -0.45203 | 0.045572 | 1.38806  |
| PERILLIC ACID (-)                   | -0.47229 | 0.024986 | 2.627684 |
| Diflunisal                          | -0.4916  | 0.00952  | 1.257416 |
| Dioxoaminopyrine                    | -0.50941 | 0.006911 | 1.212984 |
| Bowdichione                         | -0.5261  | 0.004824 | 2.756217 |
| 9E,11-Dodecadienal                  | -0.53326 | 0.025769 | 1.149813 |
| Diflunisal                          | -0.5551  | 0.000159 | 3.132189 |
| Demethylphosphinothricin            | -0.56694 | 0.010882 | 1.011501 |
| 5,6-Dichloro-1,3-cyclohexadiene     | -0.59835 | 0.000185 | 1.001822 |
| Cysteineglutathione disulfide       | -0.64141 | 0.005728 | 1.787779 |
| DG(14:1(9Z)/17:2(9Z,12Z)/0:0)[iso2] | -0.66249 | 0.003448 | 1.410126 |
| Endothion                           | -0.70721 | 0.028    | 4.70218  |
| Palmyrolide A                       | -0.70838 | 0.041715 | 2.664176 |
| Dihydrogriesenin                    | -0.77564 | 0.000497 | 1.247549 |
| Adenosine                           | -0.81862 | 0.004163 | 1.684254 |

Abbreviations: VIP, variable importance in projection; FC, fold change.
